# Supplementary material
Source: PubMed Central journal article supplement (PMC6606872)
Supplement: AEM.00247-19-s0001.pdf [file AEM.00247-19-s0001.pdf]

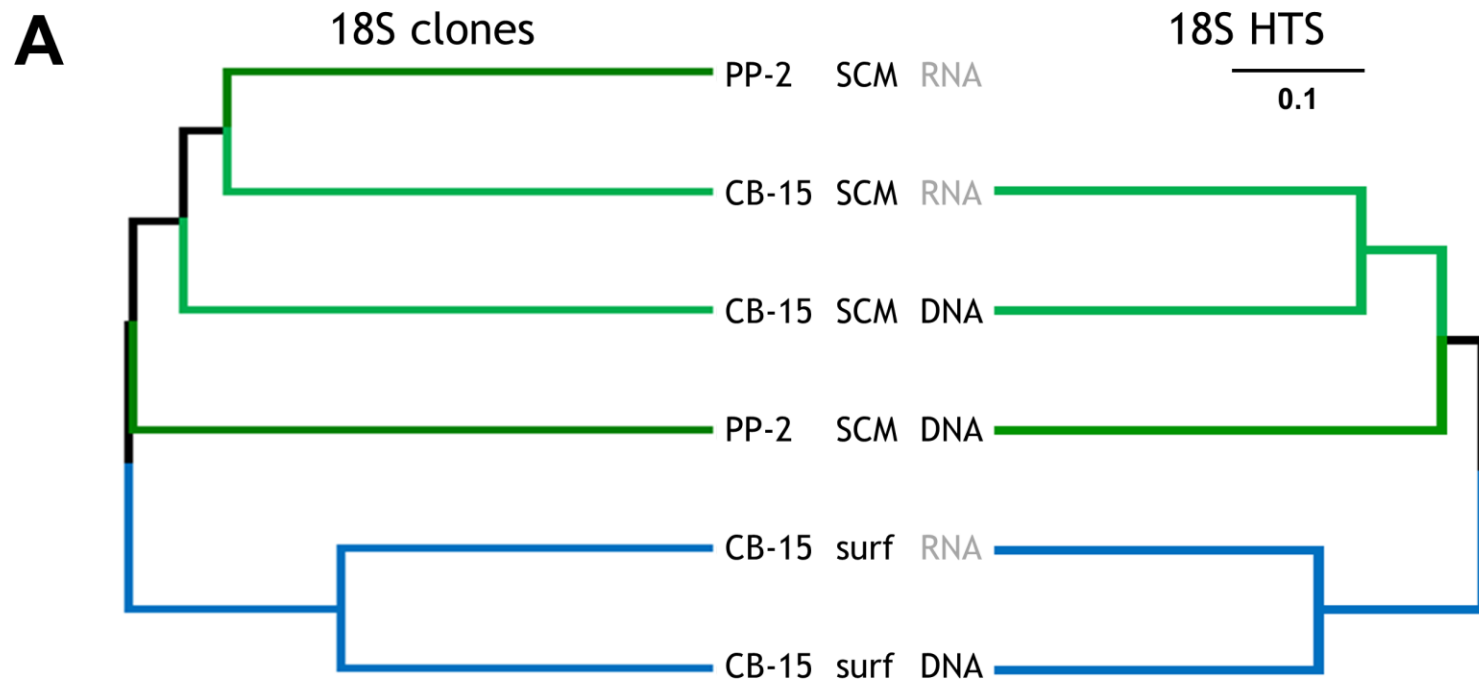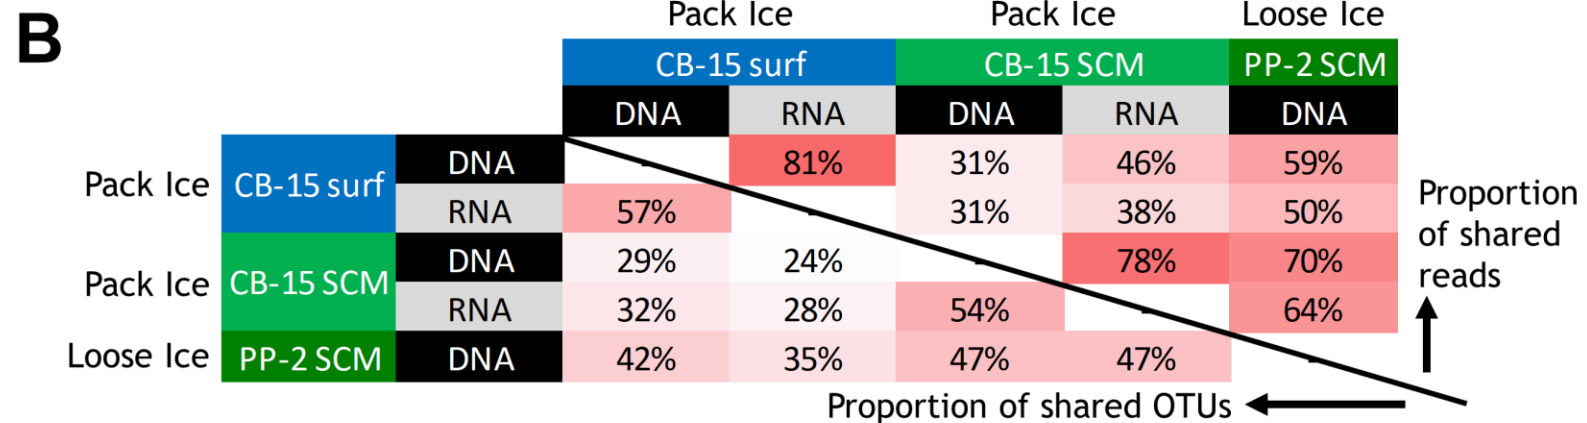

**Fig. S1. (A)** Community similarity between samples and between DNA and RNA, comparing 18S cloning vs. high-throughput sequencing (HTS). Bray-Curtis tree of the 18S cloning (99% OTUs) and HTS (98% OTUs) diversity (i.e.: richness + evenness) by sample. DNA (black text) or RNA (grey text), as well as surface (surf; blue) or SCM samples (shades of green), are indicated. Note that no RNA remained for HTS analysis of PP-2. The scale bar equals 10% dissimilarity. **(B)** Proportions of shared HTS OTUs (lower triangle) and reads (upper triangle) between each pairwise sample combination.

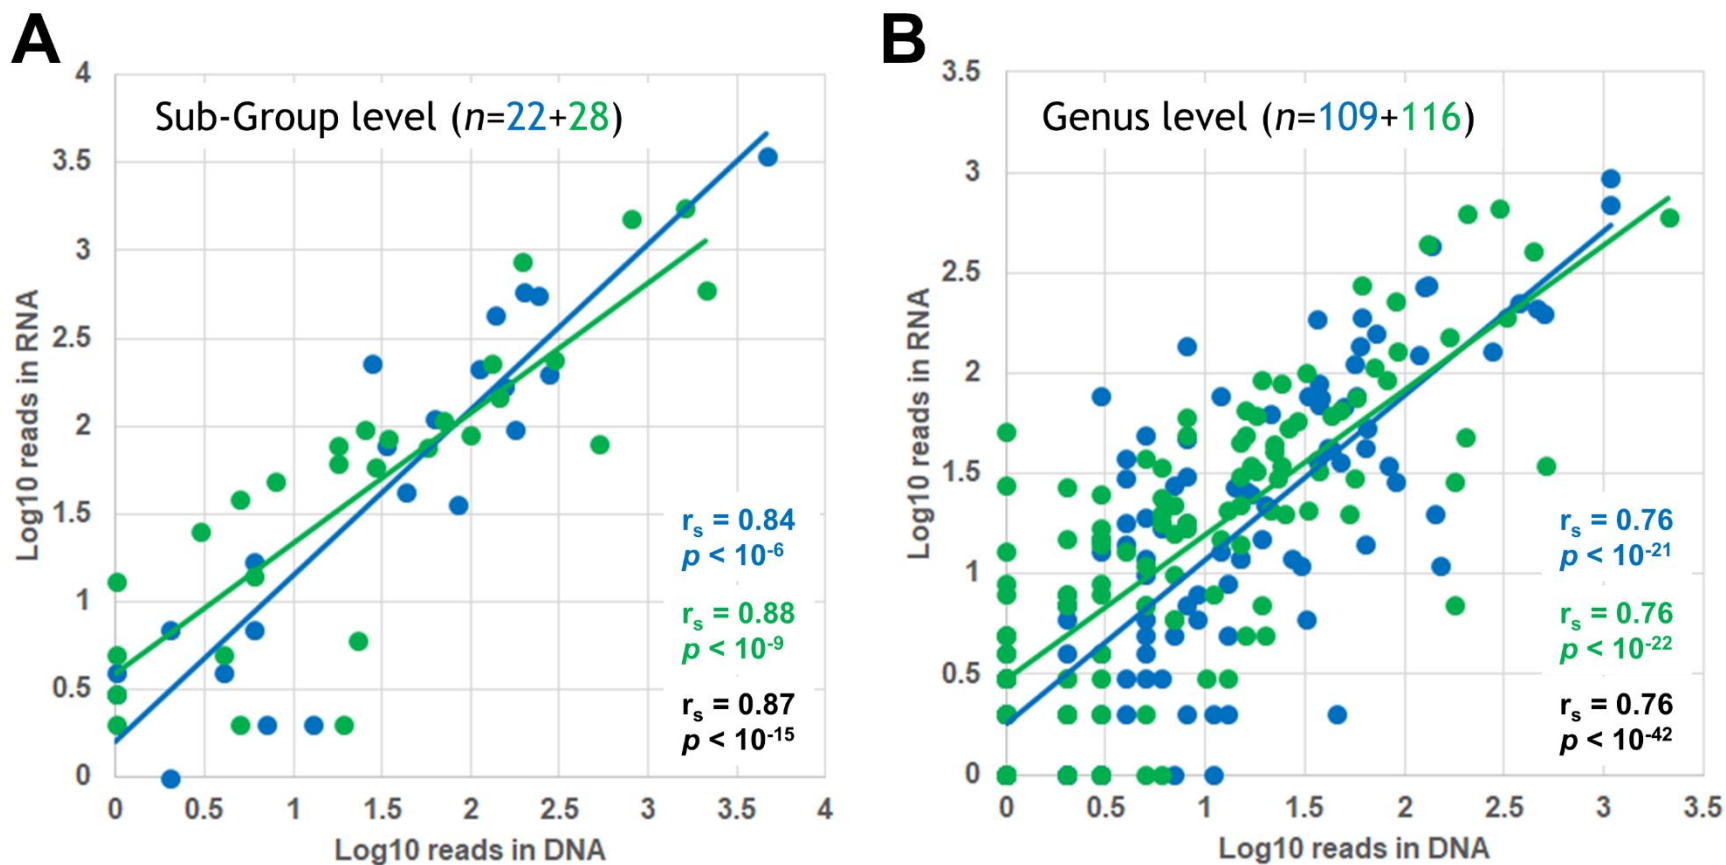

**Fig. S2.** Correlations of log-scale taxa high-throughput sequencing (HTS) reads between DNA and RNA samples at the coarser Sub-Group level (**A**) and at the finer genus level (**B**). Only CB-15 surface (blue) and CB-15 SCM (green) samples are presented as no RNA remained for HTS analysis of station PP-2. Listed are the Spearman  $r_s$  and  $p$ -values for the correlations of each individual sample (in matching colors) and for the overall trend with both samples combined (in black).

Table S1. Sample and station characteristics (“-” indicates missing data) of screened public Arctic metagenome studies.

|                                                  | AGulf       | JGI<br>Sea of Change | JGI<br>W. Arctic Ocean | UAF<br>GEOTRACES  |
|--------------------------------------------------|-------------|----------------------|------------------------|-------------------|
| Region(s)                                        | AGulf       | NS+GS                | CB                     | CB+AO             |
| # of samples                                     | 1           | 6                    | 8                      | 17                |
| # of stations                                    | 1           | 6                    | 4                      | 9                 |
| Dates of sampling                                | Dec.2007    | Jun.-Jul.2012        | Oct.2015               | Aug.-Oct.2015     |
| Range of latitudes (°N)                          | 71.62       | 69.23 to 79.02       | 73.22 to 79.25         | 72.80 to 89.99    |
| Range of longitudes (°E)                         | -126.07     | -9.52 to 9.86        | -150.23 to -150.06     | -180.00 to -89.25 |
| Depths of sampling (m)                           | 10          | 10-20                | 5-79                   | 1-100             |
| Size fraction                                    | 0.2-50 µm   | 1.2-100 µm           | 0.2-3.0 µm             | >0.22 µm          |
| Accession #                                      | PRJNA337945 | JGI Proposal 532     | JGI Proposal 2011      | PRJEB14154        |
| Reference                                        | (1)         | (2)                  | (3)                    | (4)               |
| <i>Ranges of physicochemical characteristics</i> |             |                      |                        |                   |
| Salinity (psu)                                   | 30.56       | 31.03-35.15          | 25.70-31.48            | 27.41-36.68       |
| Temperature (°C)                                 | -1.60       | -1.03 to +9.10       | -1.46 to +0.02         | -1.67 to +1.64    |
| Nitrate (µM)                                     | -           | bd-6.6               | bd-4.7                 | bd-17.5           |
| Phosphate (µM)                                   | -           | 0.46-0.88            | 0.52-1.11              | -                 |
| Silicate (µM)                                    | -           | 1.5-5.5              | 2.4-10.8               | -                 |
| <i>Sequence characteristics</i>                  |             |                      |                        |                   |
| Average # reads screened/sample (M)              | 314         | 372                  | 200                    | 5.5               |
| Range # reads screened/sample (M)                | 314         | 327-450              | 161-219                | 2.0-11.1          |
| Total # reads screened (M)                       | 314         | 2,234                | 1,599                  | 93                |
| Total # assembled GenSeed-HMM contigs            | 1           | 87                   | 64                     | 96                |
| Total # of target plankton NR contigs            | 1           | 55                   | 40                     | 15                |
| Total # of non-target eukaryote contigs          | 0           | 23                   | 7                      | 22                |
| Total # of non-target prokaryote contigs         | 0           | 5                    | 16                     | 53                |
| Average % identity of target NR matches          | 100%        | 82%                  | 85%                    | 79%               |
| Range % identity of target NR matches            | 100%        | 45-100%              | 53-100%                | 51-99%            |

AGulf, Amundsen Gulf; AO, Arctic Ocean; bd, below detection; CB, Canada Basin; GS, Greenland Sea; JGI, Joint Genome Institute; NR, nitrate reductase; NS, Norwegian Sea; UAF, University of Alaska - Fairbanks.

1. Joli N, Monier A, Logares R, Lovejoy C. 2017. Seasonal patterns in Arctic prasinophytes and inferred ecology of Bathycoccus unveiled in an Arctic winter metagenome. *ISME J* 11:1372-1385.
2. Mock T. 2014. Sea of Change: Eukaryotic phytoplankton communities in the Arctic Ocean. JGI: <https://genome.jgi.doe.gov/portal/SeaofArcticOcean/SeaofArcticOcean.info.html>
3. Walsh D. 2016. Metagenomics of western Arctic Ocean microbial communities. JGI: <https://genome.jgi.doe.gov/portal/Metofommunities/Metofommunities.info.html>
4. Collins E. 2016. Arctic Ocean metagenomes sampled aboard CGC Healy during the 2015 GEOTRACES Arctic research cruise. NCBI: <https://www.ncbi.nlm.nih.gov/bioproject/PRJEB14154>

Table S3. Primers used for cloning and (pyro)sequencing of 18S rRNA and nitrate reductase (NR) genes

| Assay/use                          | Primer <sup>a</sup>    | Product size | Sequence (5'-3') <sup>a</sup>                                     | Source     |
|------------------------------------|------------------------|--------------|-------------------------------------------------------------------|------------|
| 18S V4 pyrosequencing              | A#-E572F<br>B-E1009R   | 508 bp       | (RocheA+MID#) CYGCGGTAATTCAGCTC<br>(RocheB) AYGGTATCTRATCRTCCTTYG | (1)        |
| 18S cloning – PCR                  | NSF4/18<br>EukR        | ~1800 bp     | CTG GTT GAT YCT GCC AGT<br>TGA TCC TTC TGC AGG TTC ACC TAC        | (2)<br>(3) |
| 18S cloning – sequencing           | Euk528f                | n/a          | GCG GTA ATT CCA GCT CCA A                                         | (4)        |
| NR cloning – 1 <sup>st</sup> round | NRPt907F<br>NRPt2325R  | 1419 bp      | GGY GGN MGN ATG RTB AAG TGG CT<br>GGG VGT GAT RCC HGT VCC DCC VGC | (5)        |
| NR cloning – 2 <sup>nd</sup> round | NRPt1000F<br>NRPt1389R | 390 bp       | GRD GGH TGG TGG TAC AAG CC<br>GTT GTT YMY CAT BCC CAT             | (5)        |

<sup>a</sup> Pyrosequencing forward primers exist in 12 numbered versions (#), differing only by the 12 individual multiplex identifiers (MID = bar-codes). Also incorporated into the primers were the Roche A (forward) and B (reverse) adaptors.

1. Comeau AM, Li WKW, Tremblay J-E, Carmack EC, Lovejoy C. 2011. Arctic Ocean microbial community structure before and after the 2007 record sea ice minimum. *PLoS ONE* 6:e27492.
2. Hendriks L, Goris A, Neefs JM, Vandeppeer Y, Hennebert G, Dewachter R. 1989. The nucleotide sequence of the small ribosomal-subunit RNA of the yeast *Candida albicans* and the evolutionary position of the fungi among the Eukaryotes. *Syst Appl Microbiol* 12:223-229.
3. Medlin LK, Elwood HJ, Stickel S, Sogin ML. 1988. The characterization of enzymatically amplified eukaryotic 16S-like rRNA-coding regions. *Gene* 71:491-499.
4. Elwood HJ, Olsen GJ, Sogin ML 1985. The small-subunit ribosomal RNA gene sequences from the hypotrichous ciliates *Oxytricha nova* and *Stylonychia pustulata*. *Mol Biol Evol* 2:399-410.
5. Allen AE, Ward BB, Song B. 2005. Characterization of diatom (Bacillariophyceae) nitrate reductase genes and their detection in marine phytoplankton communities. *J Phycol* 41:95-104.
